# Supplementary material for: Zearalenone-14-Glucoside Is Hydrolyzed to Zearalenone by β-Glucosidase in Extracellular Matrix to Exert Intracellular Toxicity in KGN Cells
Source: MDPI journal article supplement (doi:10.3390/toxins14070458), 2022-07-04
Supplement: s1 [file s1]

## Article

# Zearalenone-14-Glucoside Is Hydrolyzed to Zearalenone by $\beta$ -Glucosidase in Extracellular Matrix to Exert Intracellular Toxicity in KGN cells

Haonan Ruan, Yunyun Wang, Yong Hou, Jing Zhang, Jiashuo Wu, Fangqing Zhang, Ming Sui, Jiaoyang Luo \* and Meihua Yang \*

## 1. Materials and Methods

### 1.1. Accuracy and precision

Both accuracy and precision were assessed using spiked samples. The accuracy of the proposed method was evaluated by the recoveries ( $n = 6$ ), which were calculated using the following equation: % Recovery = (Area spiked sample – Area unspiked sample) / Area standard  $\times 100\%$ . Intra-day ( $n = 6$ ) and inter day precision ( $n = 6$ ) for each mycotoxins were assessed on one day and on three continuous days and were evaluated based on relative standard deviation (RSD) values.

## 2. Results

**Table S1.** Optimized MS/MS Parameter of ZEN, Z14G,  $\alpha$ -ZEL and  $\beta$ -ZEL.

| Mycotoxin     | Ionization Mode  | Q1    | Species            | Q2                 | Rt  | DP   | CE  | CXP |
|---------------|------------------|-------|--------------------|--------------------|-----|------|-----|-----|
| ZEN           | ESI <sup>−</sup> | 317.0 | [M−H] <sup>−</sup> | 175.1 <sup>*</sup> | 5.1 | −100 | −42 | −7  |
|               |                  |       |                    | 131.1              |     |      | −40 | −25 |
| Z14G          | ESI <sup>+</sup> | 479.2 | [M−H] <sup>+</sup> | 283.4 <sup>*</sup> | 2.7 | 110  | 20  | 15  |
|               |                  |       |                    | 319.2              |     |      | 20  | 18  |
| $\alpha$ -ZEL | ESI <sup>−</sup> | 319.3 | [M−H] <sup>−</sup> | 159.9 <sup>*</sup> | 4.4 | −140 | −40 | −13 |
|               |                  |       |                    | 174.3              |     |      | −34 | −8  |
| $\beta$ -ZEL  | ESI <sup>−</sup> | 319.2 | [M−H] <sup>−</sup> | 275.3 <sup>*</sup> | 3.9 | −95  | −34 | −9  |
|               |                  |       |                    | 301.3              |     |      | −32 | −10 |

Q1:Precursor ion; Q2:Product ions; Rt: Retention time; DP: Declustering potential; CE: Collision energy; CXP: cell exit potential; \*, quantitative ion.

**Table S2.** Accuracy and Precision of ZEN,Z14G,  $\alpha$ -ZEL and  $\beta$ -ZEL.

| Mycotoxins    | Intra-day Precision<br>(RSD%, $n = 6$ ) | Inter-day Precision<br>(RSD%, $n = 6$ ) | Mean Recovery(%)<br>( $n = 6$ ) |               |
|---------------|-----------------------------------------|-----------------------------------------|---------------------------------|---------------|
|               |                                         |                                         | Intracellular                   | Extracellular |
| ZEN           | 1.29                                    | 0.96                                    | 102.13                          | 91.41         |
| Z14G          | 1.35                                    | 0.55                                    | 100.81                          | 100.73        |
| $\alpha$ -ZEL | 0.86                                    | 1.11                                    | 88.03                           | 92.59         |
| $\beta$ -ZEL  | 0.91                                    | 0.98                                    | 109.83                          | 85.58         |

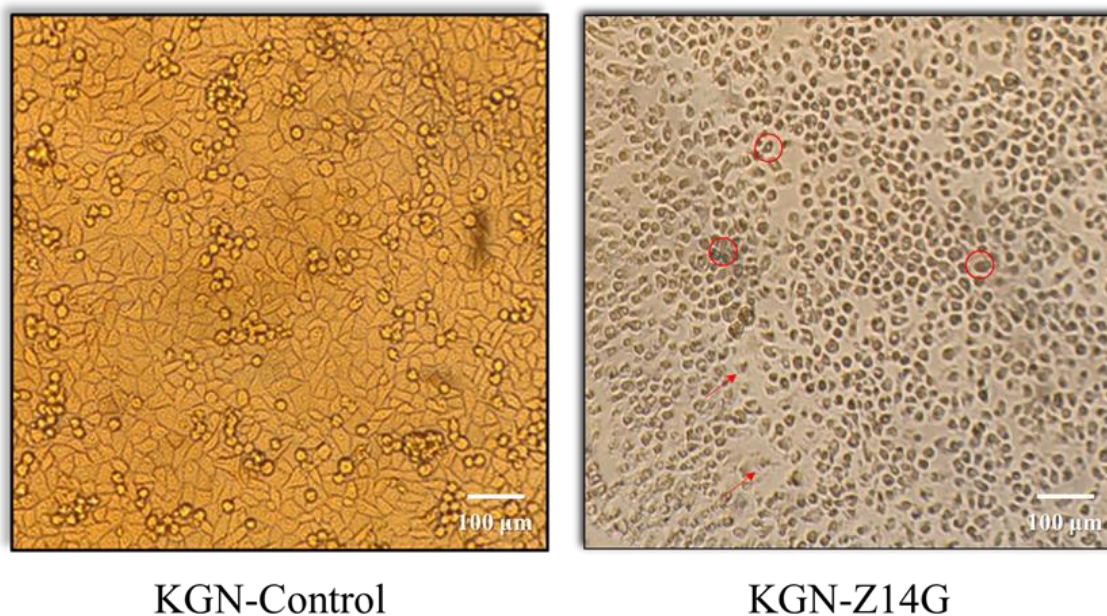

**Figure S1.** Cell Morphology of KGN after Administration of Z14G (420 μM, 24 h) (100×), red circles represent cell shrinkage and red arrows represent cell fragmentation.
